# Supplementary material for: Turnover intention among intensive care nurses and the influence of the COVID-19 pandemic: a scoping review
Source: Springer Nature journal article supplement (doi:10.1186/s12960-025-00992-7), 2025-05-15
Supplement: MOESM2 [file 12960_2025_992_MOESM2_ESM.pdf]

## Additional file 2 Search strategy and search terms

### Search Tool Specification

| PCC        | Description                                                                                                              | Specification                            | Terms to search                                                      |
|------------|--------------------------------------------------------------------------------------------------------------------------|------------------------------------------|----------------------------------------------------------------------|
| Population | Nurses                                                                                                                   | Nurse                                    | Nurs*                                                                |
| Concept    | Intention to leave (ITL), turnover intention, intention to quit, intention to stay (ITS) according to Hom et al. (2017). | Intention to leave and intention to stay | Turnover intent*, intent* to leave, intent* to quit, intent* to stay |
| Context    | <i>Neonatal, pediatric, and adult Intensive Care Unit (ICU), Critical Care Unit in hospital setting</i>                  | Intensive Care or Critical Care          | Intensive Care or Critical Care                                      |

### Research Questions:

**RQ 1:** What factors impacting intensive and critical care nurses' intention to leave have been identified by the scientific literature so far?

**RQ 2:** What factors impacting intensive and critical care nurses' intention to stay have been identified in the scientific literature so far?

**RQ3:** What findings did the literature reveal regarding the impact of the COVID-19 pandemic on critical care nurses' intention to leave or stay?

### Scoping review search strategy and search terms

Search strategy for factors that contribute to intensive and critical care nurses' intention to leave or stay

### Database: Scopus

| Search round | Query string                                                                                                         |
|--------------|----------------------------------------------------------------------------------------------------------------------|
| 1            | TITLE-ABS-KEY (turnover intent* AND critical care OR intensive care AND nurs*) AND PUBYEAR > 1999 AND PUBYEAR < 2023 |
| 2            | TITLE-ABS-KEY (intent* to leave AND critical care OR intensive care AND nurs*) AND PUBYEAR > 1999 AND PUBYEAR < 2023 |
| 3            | TITLE-ABS-KEY (intent* to quit AND critical care OR intensive care AND nurs*) AND PUBYEAR > 1999 AND PUBYEAR < 2023  |
| 4            | TITLE-ABS-KEY (intent* to stay AND critical care OR intensive care AND nurs*) AND PUBYEAR > 1999 AND PUBYEAR < 2023  |

### Database: Wiley

- Context Search: Abstract
- Custom range: 01/2000 – 12/2022

| Search round | Query string                                                   |
|--------------|----------------------------------------------------------------|
| 1            | intent* to leave AND critical care OR intensive care AND nurs* |
| 2            | intent* to quit AND critical care OR intensive care AND nurs*  |
| 3            | turnover intent* AND critical care OR intensive care AND nurs* |
| 4            | intent* to stay AND critical care OR intensive care AND nurs*  |

### Database: PubMed

- Publication date: 2000 - 2022

| Search round | Query                                                                                                |
|--------------|------------------------------------------------------------------------------------------------------|
| 1            | #1 "intention to leave"[tw] AND #2 "critical care" [tw] OR "intensive care" [tw] AND #3 "nurs*" [tw] |
| 2            | #1 "intent to leave"[tw] AND #2 "critical care" [tw] OR "intensive care" [tw] AND #3 "nurs*" [tw]    |
| 3            | #1 "intention to stay"[tw] AND #2 "critical care" [tw] OR "intensive care" [tw] AND #3 "nurs*" [tw]  |
| 4            | #1 "intent to stay"[tw] AND #2 "critical care" [tw] OR "intensive care" [tw] AND #3 "nurs*" [tw]     |
| 5            | #1 "intention to quit"[tw] AND #2 "critical care" [tw] OR "intensive care" [tw] AND #3 "nurs*" [tw]  |
| 6            | #1 "intent to quit"[tw] AND #2 "critical care" [tw] OR "intensive care" [tw] AND #3 "nurs*" [tw]     |
| 7            | #1 "turnover intention"[tw] AND #2 "critical care" [tw] OR "intensive care" [tw] AND #3 "nurs*" [tw] |
| 8            | #1 "turnover intent"[tw] AND #2 "critical care" [tw] OR "intensive care" [tw] AND #3 "nurs*" [tw]    |

### Database: APA PsycNet

**Abstract:** intent\* to leave *OR* **Abstract:** intent\* to quit *OR* **Abstract:** intent\* to stay *OR* **Abstract:** turnover intent\* *AND* **Abstract:** critical care *OR* **Abstract:** intensive care *AND* **Abstract:** nurs\* *AND* **Peer-Reviewed Journals only** *AND* **Year:** 2000 *To* 2022

**Database: Web of science**

– Publication year: 2000 - 2022

| Search round | Query                                                                                 |
|--------------|---------------------------------------------------------------------------------------|
| 1            | ((AB=(intent* to leave)) AND AB=("intensive care" OR "critical care")) AND AB=(nurs*) |
| 2            | ((AB=(intent* to quit)) AND AB=("intensive care" OR "critical care")) AND AB=(nurs*)  |
| 3            | ((AB=(intent* to stay)) AND AB=("intensive care" OR "critical care")) AND AB=(nurs*)  |
| 4            | ((AB=(turnover intent*)) AND AB=("intensive care" OR "critical care")) AND AB=(nurs*) |
